# Supplementary material for: Synthesis, mixed valence aspects and non-linear optical properties of the triruthenium complexes [{(bpy)2RuII}3(L)]3+and [{(phen)2RuII}3(L)]3+(bpy = 2,2′-bipyridine, phen = 1,10-phenanthroline and L3−= 1,3,5-triazine-2,4,6-trithiol)
Source: Royal Society of Chemistry journal article supplement (doi:10.1039/b302878j), 2003-01-01
Supplement: b302878j.doc [file b302878j.doc]

**Figure Captions**

## Fig. S1 Electrospray mass spectrum of [{(bpy)2RuII}3(L)](ClO4)3, [1](ClO4)3 : (a) shows the measured spectrum and (b) shows an expansion of the isotopic distribution pattern of the metal ions.

**Fig. S2** Emission spectra of (a) [{(bpy)2RuII}3(L)](ClO4)3 ,[**1**](ClO4)3 and (b) [{(phen)2RuII}3(L)](ClO4)3 , [**2**](ClO4)3 in 1:4 MeOH/EtOH at 77 K.

**Fig. S3** Experimental layout for nonlinear absorption and z-scan measurement.


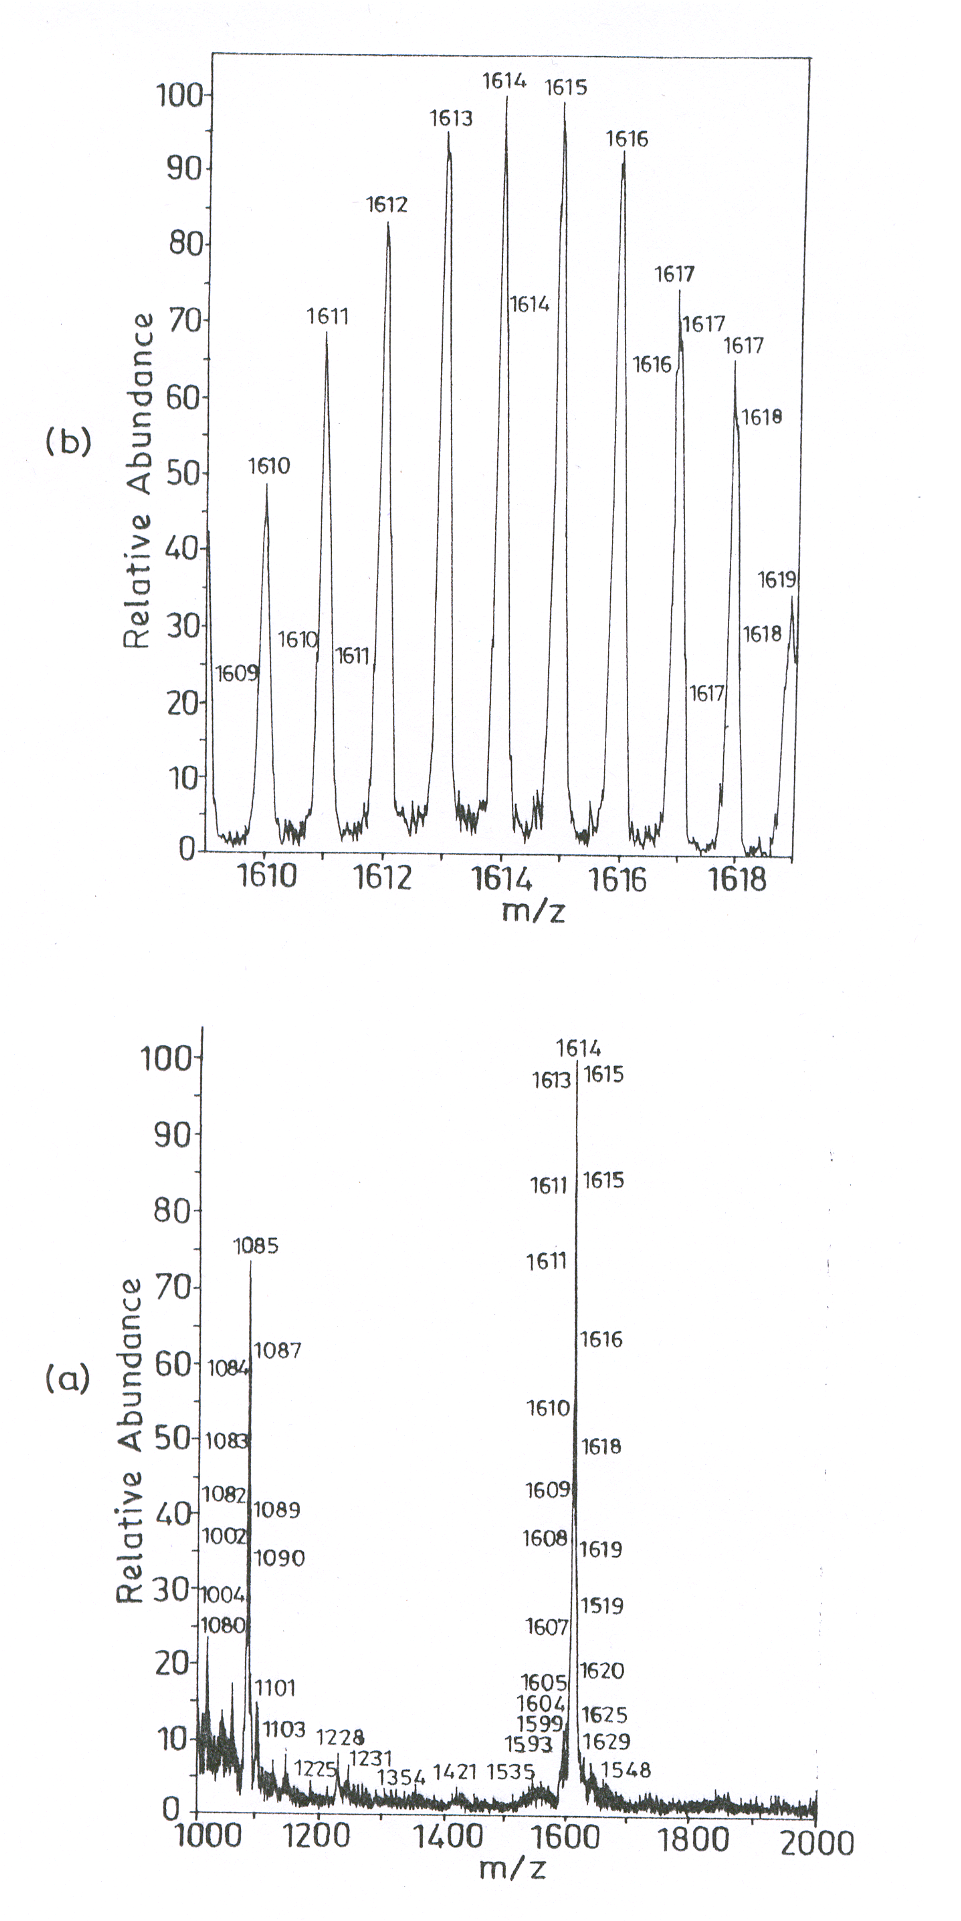


**Fig. S1**

**Fig.S2**
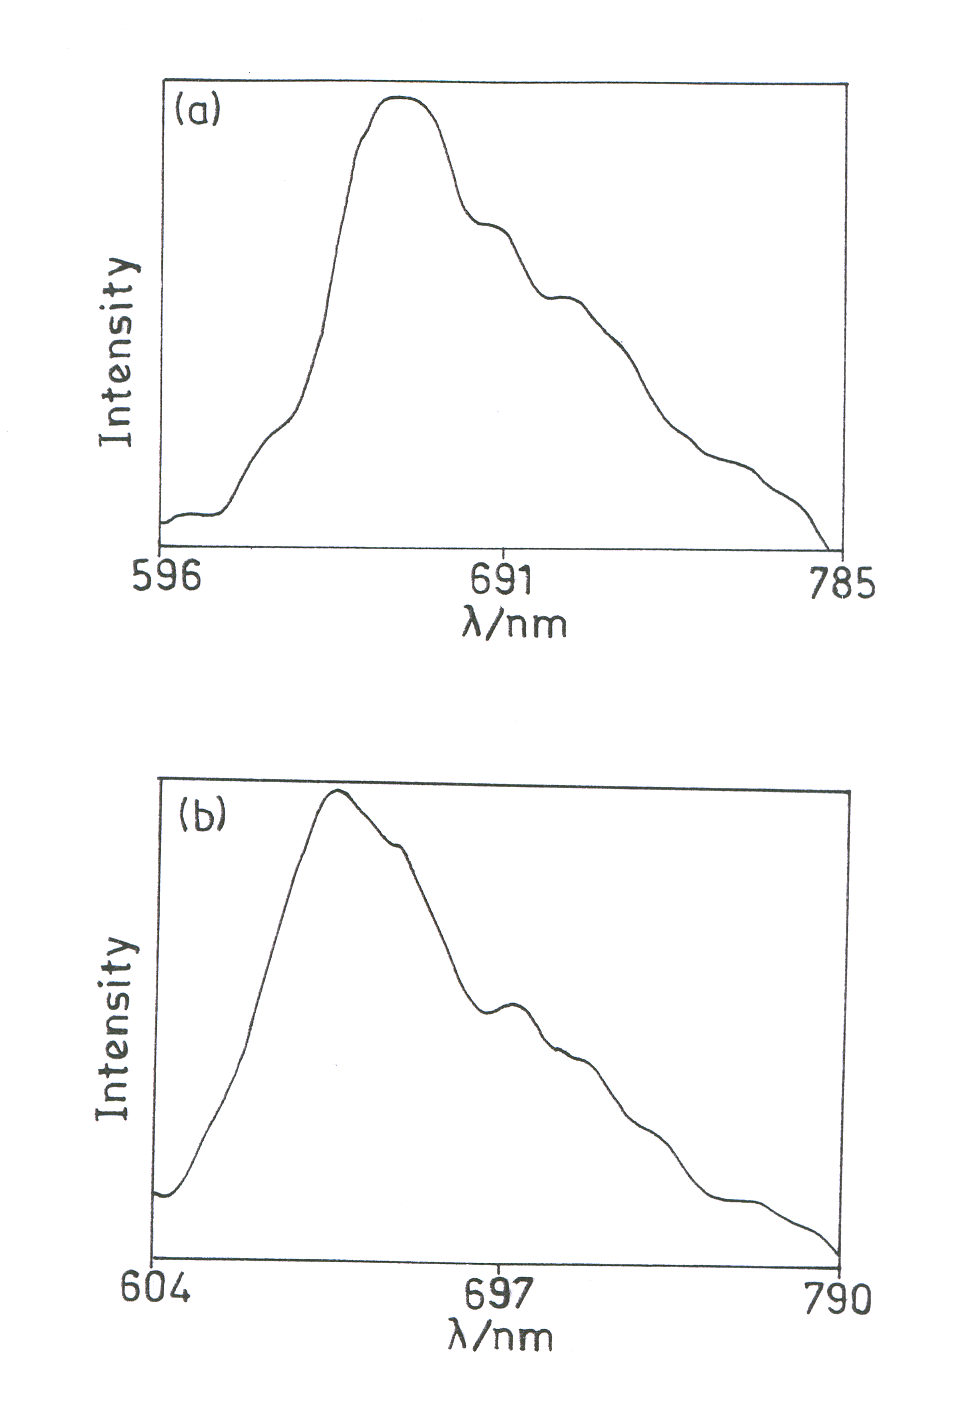


Attenuator

Sample

+z

Nd:Yag

Laser

-z

Computer

SHG

Oscilloscope

PD1

PD2

**Fig. S3**
